# Supplementary material for: Cardiometabolic disease risk and HIV status in rural South Africa: establishing a baseline
Source: PubMed Central journal article supplement (PMC4335669; doi:10.1186/s12889-015-1467-1), 2015-02-12

**Table S1. Median values of cardiometabolic risk factors, by sex, age group, and HIV sero- and treatment status, Agincourt sub-district, South Africa, 2010-2011**

[all estimates include sampling weights]

|                     | <b>Women</b> |                    |                    |       |       |                    |                    |       |       |                    |                    |       |
|---------------------|--------------|--------------------|--------------------|-------|-------|--------------------|--------------------|-------|-------|--------------------|--------------------|-------|
|                     | Total        | 18-29 (N = 516)    |                    |       | Total | 30-49 (N = 861)    |                    |       | Total | 50+ (N = 699)      |                    |       |
| HIV-                |              | HIV+, no treatment | HIV+, on treatment | HIV-  |       | HIV+, no treatment | HIV+, on treatment | HIV-  |       | HIV+, no treatment | HIV+, on treatment |       |
| Body mass index     | 23·54        | 23·26              | 24·62              | 24·36 | 27·4  | 28·73              | 25·72              | 25·5  | 26·87 | 27·06              | 25·91              | 23·63 |
| Waist circumference | 78           | 77·3               | 82                 | 85·6  | 90·2  | 93·2               | 85·5               | 86    | 94·2  | 95·6               | 89                 | 85·5  |
| Blood glucose       | 5·1          | 5·1                | 5·1                | 4·8   | 5·2   | 5·3                | 5·1                | 5·3   | 5·7   | 5·8                | 5·4                | 5·3   |
| Systolic BP         | 117·5        | 118·5              | 115·5              | 112·5 | 125·5 | 128                | 123                | 119   | 136·5 | 137                | 130·5              | 126   |
| Diastolic BP        | 78           | 78·5               | 76·5               | 79·5  | 86·5  | 87·5               | 86                 | 82    | 88    | 88                 | 88                 | 85·5  |
| Total cholest/HDL   | 2·8          | 2·81               | 2·79               | 2·72  | 2·84  | 2·88               | 2·74               | 2·74  | 3·17  | 3·2                | 2·98               | 2·93  |
| Triglycerides       | 0·77         | 0·73               | 0·84               | 0·74  | 1·04  | 1·03               | 1·01               | 1·18  | 1·3   | 1·29               | 1·34               | 2·25  |
| LDL cholesterol     | 1·88         | 1·95               | 1·72               | 1·6   | 2·32  | 2·39               | 2·08               | 2·35  | 3·07  | 3·19               | 2·25               | 2·89  |
| HDL cholesterol     | 1·4          | 1·42               | 1·27               | 1·59  | 1·58  | 1·59               | 1·58               | 1·64  | 1·77  | 1·76               | 1·72               | 2·23  |
|                     |              |                    |                    |       |       |                    |                    |       |       |                    |                    |       |
|                     | <b>Men</b>   |                    |                    |       |       |                    |                    |       |       |                    |                    |       |
|                     | Total        | 18-29 (N = 429)    |                    |       | Total | 30-49 (N = 456)    |                    |       | Total | 50+ (N = 503)      |                    |       |
| HIV-                |              | HIV+, no treatment | HIV+, on treatment | HIV-  |       | HIV+, no treatment | HIV+, on treatment | HIV-  |       | HIV+, no treatment | HIV+, on treatment |       |
| Body mass index     | 20·99        | 20·98              | 21·55              | 25·87 | 22·96 | 23·49              | 22·32              | 20·88 | 23·41 | 23·69              | 22·03              | 21·68 |
| Waist circumference | 74·6         | 74·5               | 74                 | 89·2  | 82·3  | 84                 | 80·2               | 79·2  | 87    | 88·1               | 83·3               | 86    |
| Blood glucose       | 4·9          | 4·9                | 4·7                | 6     | 5·1   | 5·1                | 5·1                | 5·3   | 5·6   | 5·7                | 5·3                | 5·6   |
| Systolic BP         | 124          | 124·5              | 123·75             | 121   | 127   | 127                | 127·5              | 125·5 | 136   | 138                | 125·5              | 127   |
| Diastolic BP        | 78·5         | 78·5               | 80·5               | 81·5  | 85    | 85                 | 85·5               | 89    | 87·5  | 88·5               | 83·5               | 81    |
| Total cholest/HDL   | 2·56         | 2·57               | 2·37               | 2·27  | 2·8   | 2·96               | 2·54               | 2·75  | 2·78  | 2·77               | 2·83               | 2·74  |
| Triglycerides       | 0·83         | 0·82               | 0·92               | 1·48  | 1·19  | 1·18               | 1·18               | 1·3   | 1·18  | 1·15               | 1·19               | 1·36  |
| LDL cholest         | 1·69         | 1·69               | 1·66               | 1·55  | 2·03  | 2·23               | 1·8                | 2·24  | 2·42  | 2·55               | 2·29               | 2·41  |
| HDL cholest         | 1·32         | 1·32               | 1·48               | 1·75  | 1·52  | 1·52               | 1·48               | 1·7   | 1·68  | 1·69               | 1·48               | 1·74  |

**Figure S1. Prevalence of cardiometabolic risk factors, by sex, age group, and HIV sero- and treatment status, Agincourt sub-district, South Africa, 2010-2011**  
 [all estimates include sampling weights]

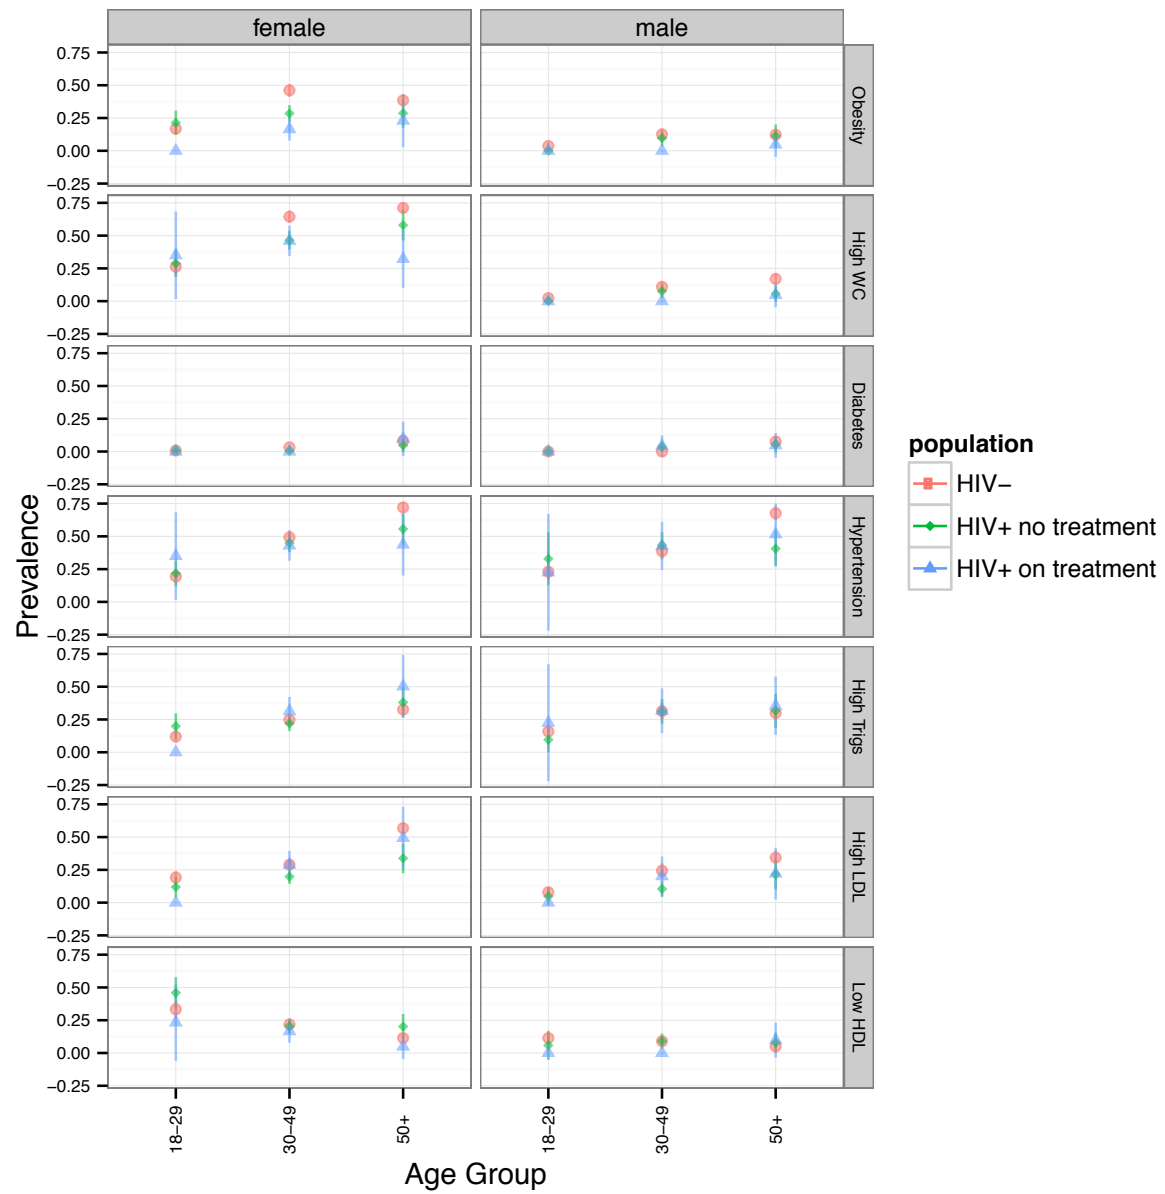

Supplement: 12889_2015_1467_MOESM1_ESM.pdf [file 12889_2015_1467_MOESM1_ESM.pdf]
